# Supplementary material for: Link between glucose metabolism and epithelial-to-mesenchymal transition drives triple-negative breast cancer migratory heterogeneity
Source: PubMed Central journal article supplement — iScience. 2022 Oct 1;25(10):105190. doi: 10.1016/j.isci.2022.105190 (PMC9579510; doi:10.1016/j.isci.2022.105190), 2022-10-01
Supplement: mmc1.pdf [file mmc1.pdf]

iScience, Volume 25

## **Supplemental information**

### **Link between glucose metabolism and epithelial-to-mesenchymal transition drives triple-negative breast cancer migratory heterogeneity**

**Samantha C. Schwager, Jenna A. Mosier, Reethi S. Padmanabhan, Addison White, Qinzhe Xing, Lauren A. Hapach, Paul V. Tafalele, Ismael Ortiz, and Cynthia A. Reinhart-King**

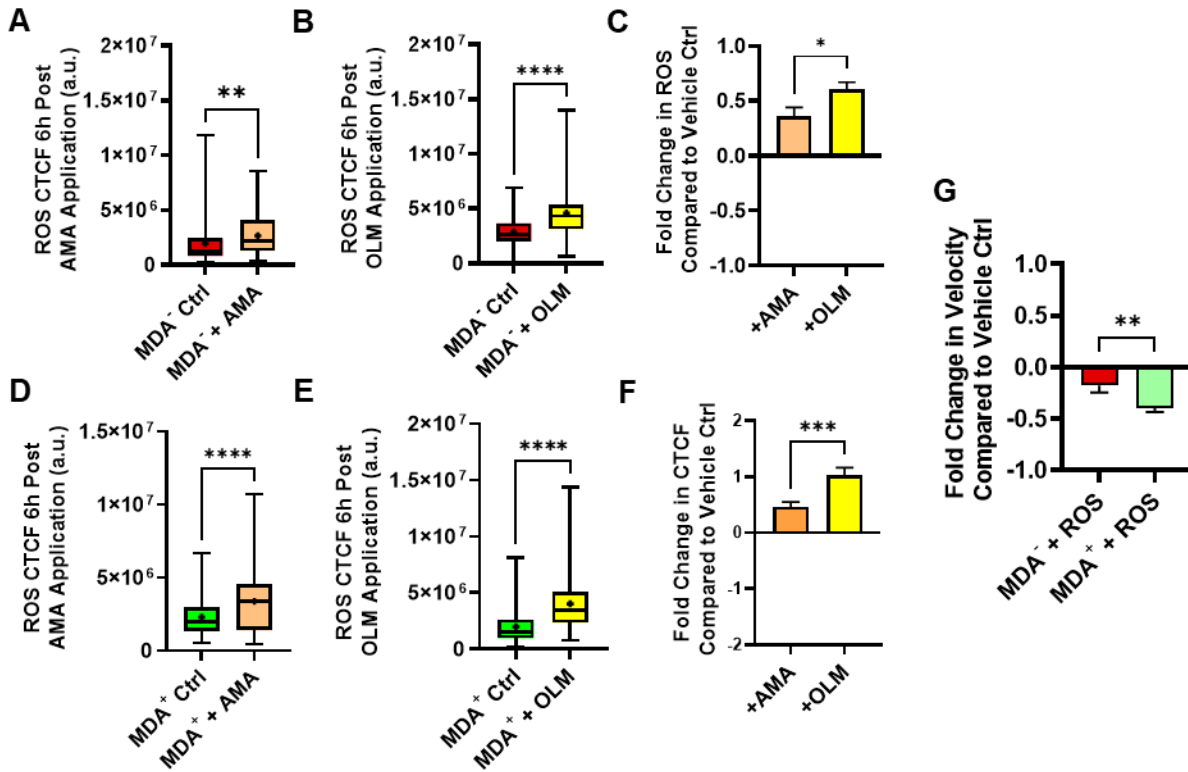

**Supplementary Figure 1. Modulation of mitochondrial respiration induces ROS production and reduces velocity in MDA subpopulations. Related to Figure 5.**

(A) ROS production in MDA<sup>-</sup> 6 h after 250  $\mu$ M AMA or vehicle control application in 2D (N=3, n=128/condition); (B) ROS production in MDA<sup>-</sup> 6 h after 100  $\mu$ M OLM or vehicle control application in 2D (N=3, n=115-122/condition); (C) Fold change in ROS production between treated and control conditions in MDA<sup>-</sup> (A-B); (D) ROS production in MDA<sup>+</sup> 6 h after 250  $\mu$ M AMA or vehicle control application in 2D (N=3, n=102-107); (E) ROS production in MDA<sup>+</sup> 6 h after 100  $\mu$ M OLM or vehicle control application in 2D (N=3, n=93-103); (F) Fold change in ROS production between treated and control conditions in MDA<sup>+</sup> (D-E); (G) Fold change in velocity between treated and vehicle control conditions of MDA<sup>+</sup> and MDA<sup>-</sup> treated with 100  $\mu$ M ROS activator, tert-butyl hydroperoxide (TBHP) (N=3, n=74/condition). \* denotes  $p < 0.05$ , \*\* denotes  $p < 0.01$ , \*\*\* denotes  $p < 0.001$ , \*\*\*\* denotes  $p < 0.0001$ . Mean + SEM shown for bar graphs and min to max for box-and-whisker plots with mean represented as "+".

|              | <b>Forward (5' to 3')</b> | <b>Reverse (5' to 3')</b> |
|--------------|---------------------------|---------------------------|
| <b>CDH1</b>  | GCCTCCTGAAAAGAGAGTGGAAG   | TGGCAGTGTCTCTCCAAATCCG    |
| <b>VIM</b>   | AGGCAAAGCAGGAGTCCACTGA    | ATCTGGCGTTCCAGGGACTCAT    |
| <b>ZEB1</b>  | GGCATACACCTACTCAACTACGG   | TGGGCGGTGTAGAATCAGAGTC    |
| <b>SNAI1</b> | TGCCCTCAAGATGCACATCCGA    | GGGACAGGAGAAGGGCTTCTC     |
| <b>ACTB</b>  | CACAAGCAGAGTGCTGAAGGTG    | GATTCCTGAGAGTCCAAAGACAG   |

**Supplementary Table 1. qPCR Primers. Related to Methods.**

Primers designed for qPCR.
